# Supplementary material for: Precious-Metal-Decorated Chromium(IV) Oxide Nanowires as Efficient Catalysts for 2,4-Toluenediamine Synthesis
Source: MDPI journal article supplement (doi:10.3390/ijms22115945), 2021-05-31
Supplement: s1 [file s1]

## SUPPLEMENTARY INFORMATION

## Precious Metals Decorated Chromium(IV) oxide Nanowires as Efficient Catalysts for 2,4-toluenediamine Synthesis

Viktória Hajdu<sup>1</sup>, Alexandra Jakab-Nácsa<sup>1,2</sup>, Gábor Muránszky<sup>1</sup>, István Kocserha<sup>3</sup>, Béla Fiser<sup>1,4</sup>, Tibor Ferenczi<sup>5</sup>, Miklós Nagy<sup>1\*</sup>, Béla Viskolcz<sup>1</sup>, László Vanyorek<sup>1\*</sup>

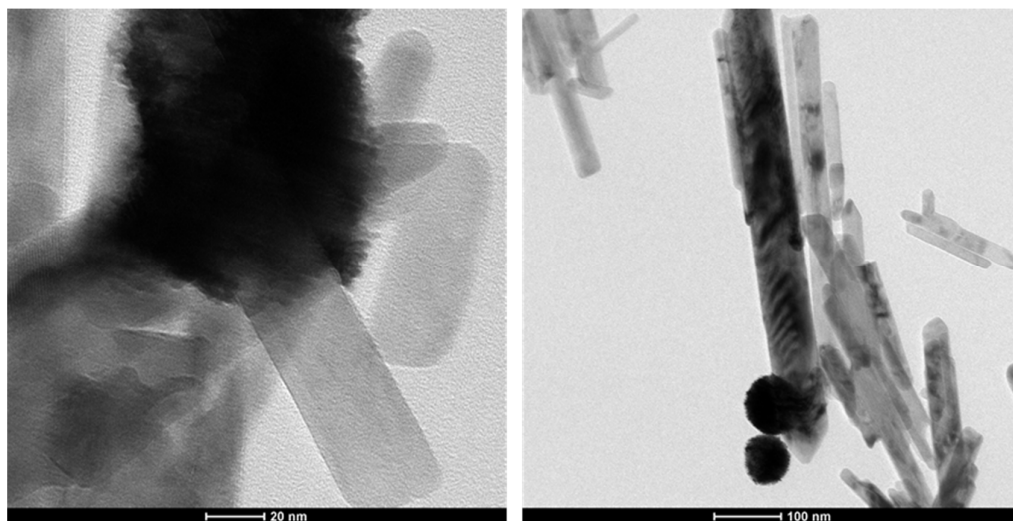

FigS1: TEM pictures of the aggregated platinum nanoparticles on the surface of the  $\text{CrO}_2$  nanowires.

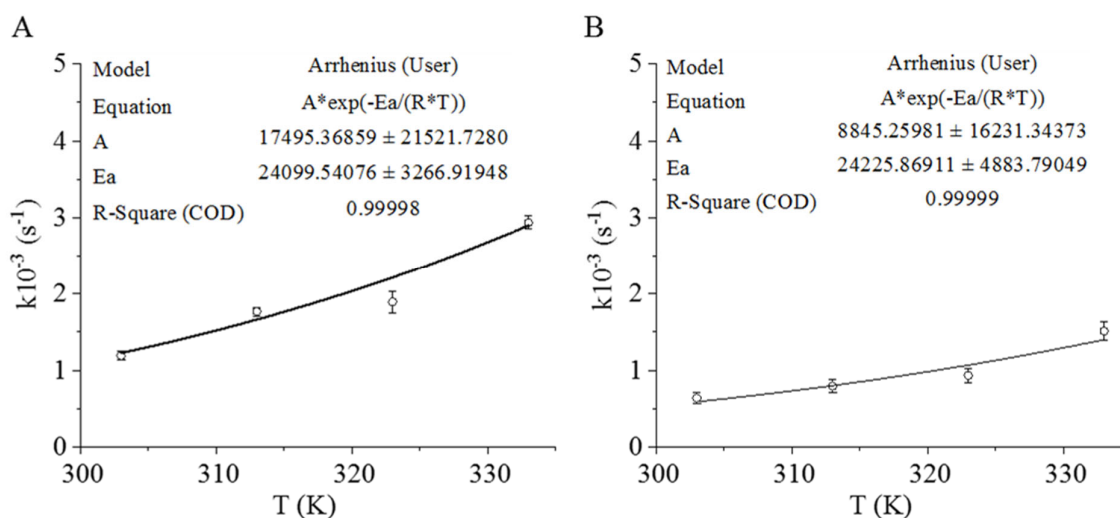

FigS2: Calculation of the activation energies ( $E_a$ ) by non-linear regression of the Arrhenius plots in the case of the  $\text{Pt/CrO}_2$  (A),  $\text{Pd/CrO}_2$  (B) catalysts.

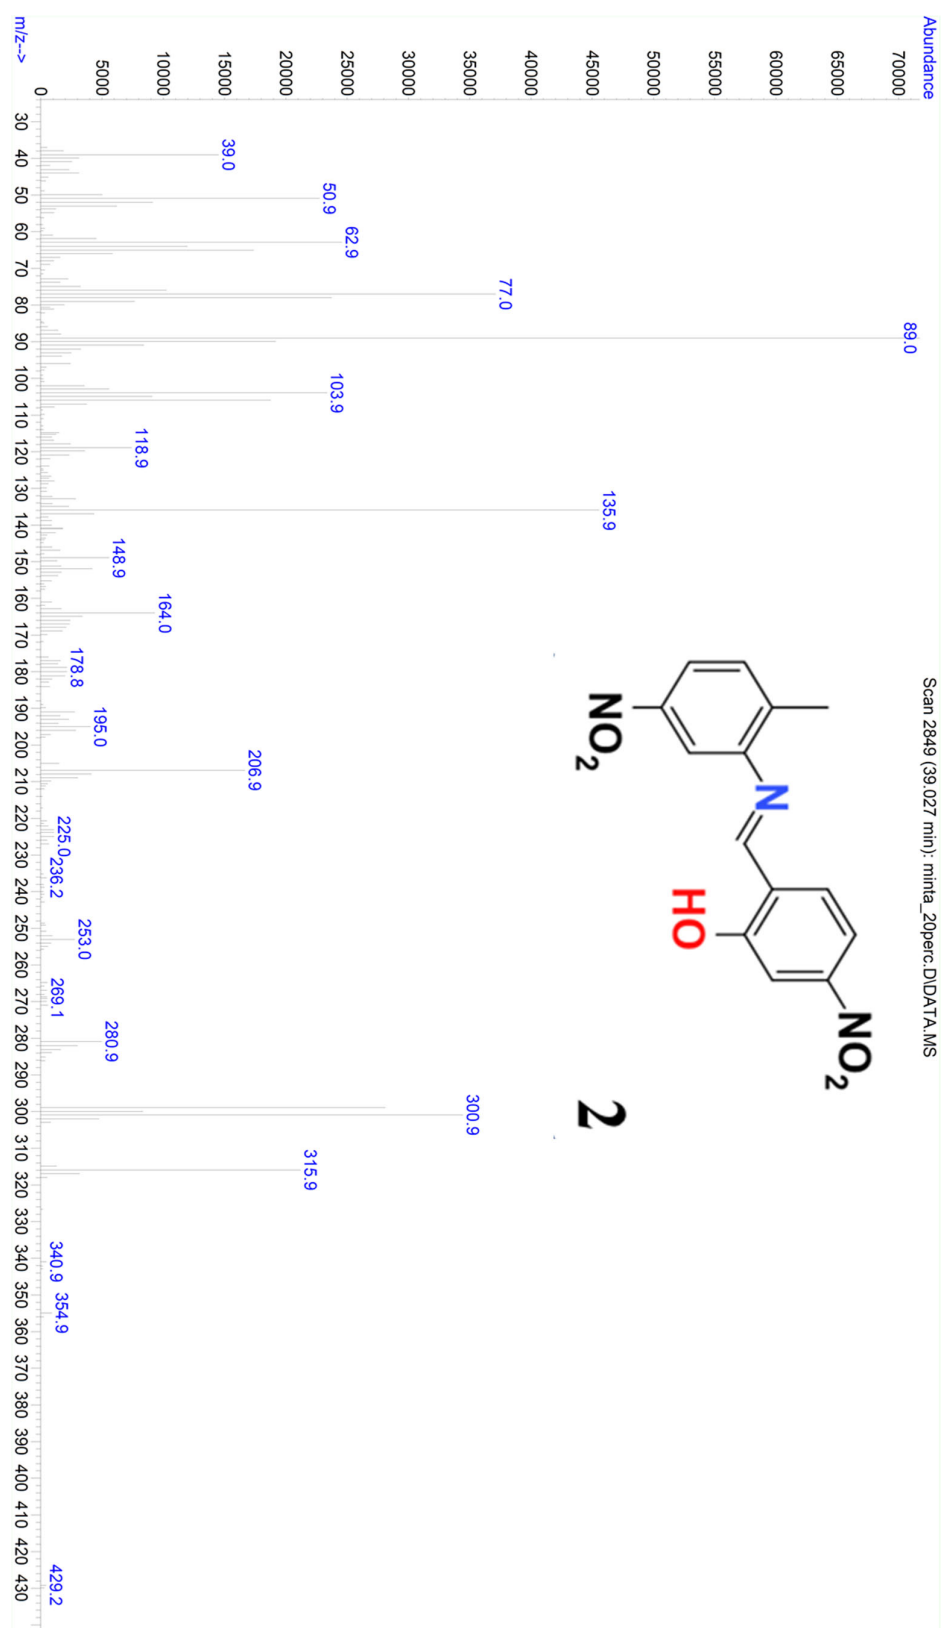

FigS3: Mass spectrum of the 2-[(*E*)-[(2-methyl-5-nitrophenyl)imino]methyl]-5-nitrophenol

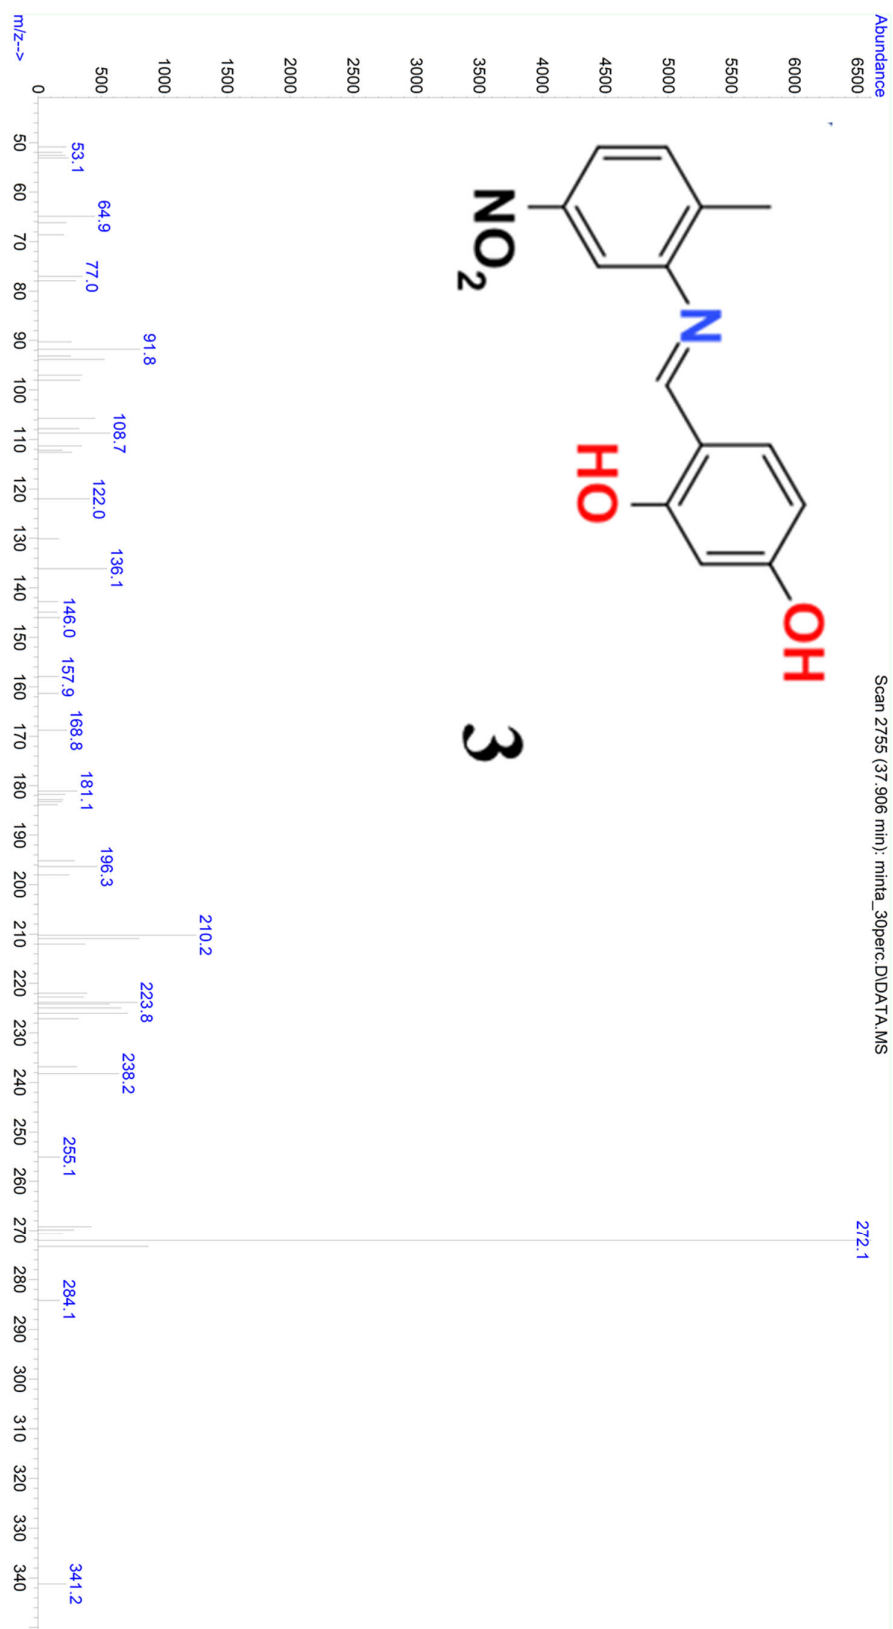

FigS4: Mass spectrum of the 4-[(E)-[(2-methyl-5-nitrophenyl)imino]methyl]benzene-1,3-diol

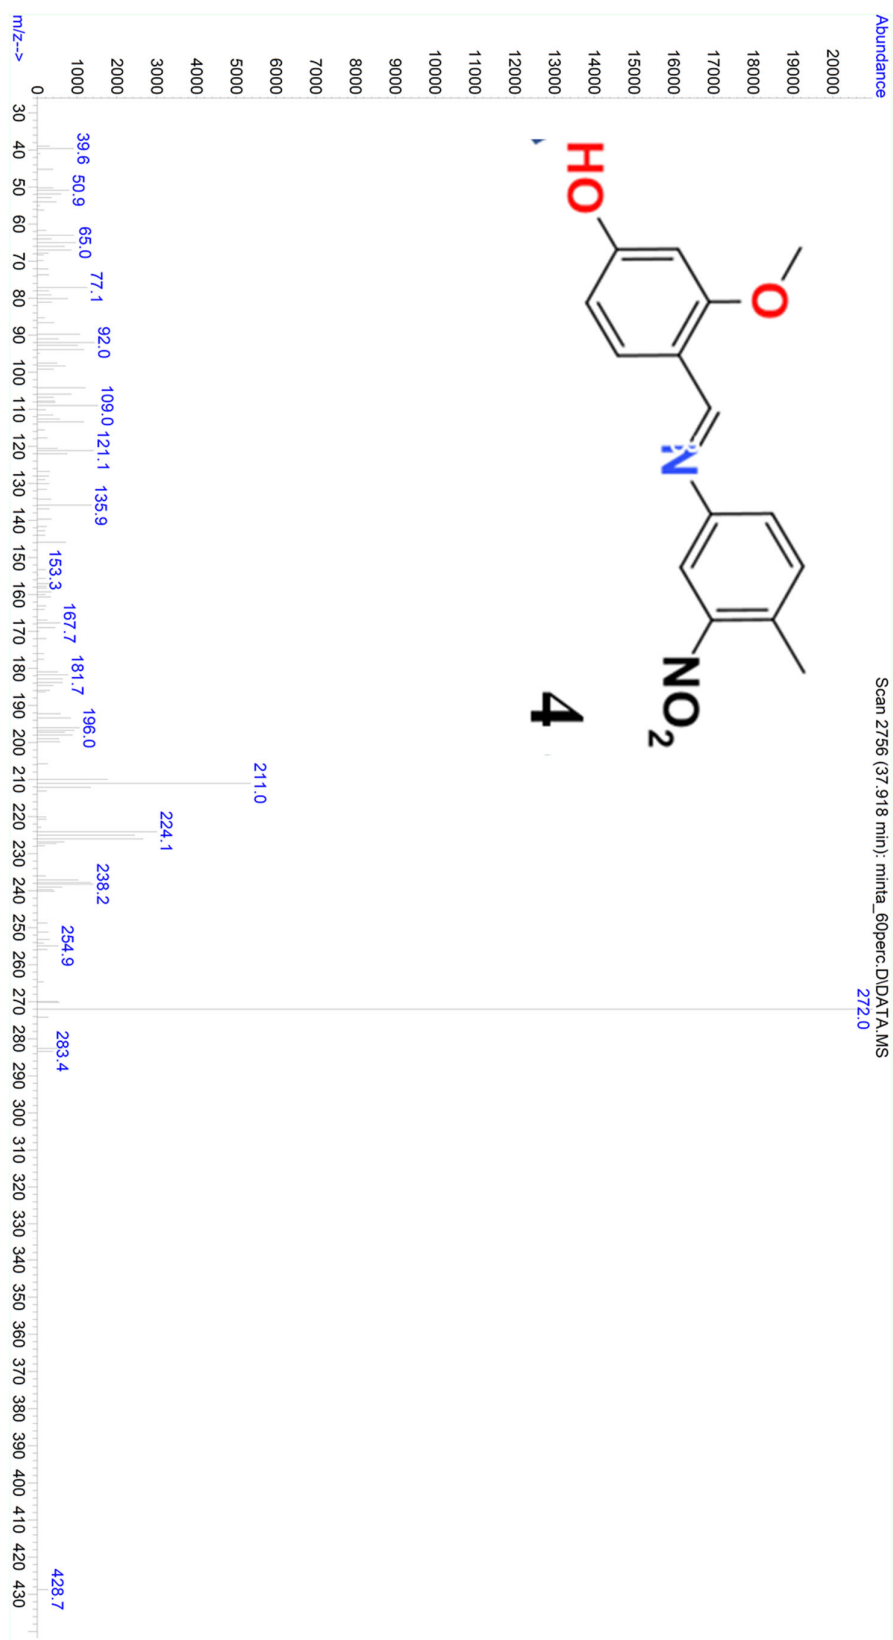

FigS5: Mass spectrum of the 3-methoxy-4-[(E)-[(4-methyl-3-nitrophenyl)imino]methyl]phenol
